# Supplementary material
Source: publisher figshare collection journal article supplement (https://acs.figshare.com/ndownloader/files/8974738)
Supplement: Supplementary file 1 [file 8974738]

**Supporting Information for**

**Non-invasive and Highly Selective Monitoring of  
Intracellular Glucose *via* Two-steps  
Recognition-based Nanokit**

Jianru Tang<sup>†</sup>, Dandan Ma<sup>†</sup>, Stevan Pecic<sup>§</sup>, Caixia Huang<sup>†</sup>, Jing Zheng<sup>†,\*</sup>, Jishan Li<sup>†</sup>,  
Ronghua Yang<sup>†,‡,\*</sup>

<sup>†</sup>State Key Laboratory of Chemo/Biosensing and Chemometrics, College of Chemistry and Chemical Engineering, Hunan University, Changsha, 410082, China;

<sup>‡</sup>School of Chemistry and Biological Engineering, Changsha University of Science and Technology, Changsha, 410082, China; <sup>§</sup>University Medical Center, Columbia University, New York, 10032, USA

\*To whom correspondence should be addressed:

E-mail: zhengjing2013@hnu.edu.cn; Yangrh@pku.edu.cn

Fax: +86-731-8882 2523

|                                                       |     |
|-------------------------------------------------------|-----|
| 1. Experiment Section.....                            | 3   |
| 2. DNA Sequences used in this Work.....               | 3   |
| 3. Determination of Glucose in Cell Lysate.....       | 3   |
| 4. The synthetic route of the Shinkai's receptor..... | 4   |
| 5. Representative TEM image of AuNPs.....             | 4   |
| 6. Fluorescence Data.....                             | 5   |
| 7. <sup>1</sup> H NMR of the Shinkai's receptor.....  | 5   |
| 8. Fluorescence Data.....                             | 6   |
| 9. AFM Images.....                                    | 7   |
| 10. Fluorescence Data.....                            | 7-9 |
| 11. Confocal Microscopy Images.....                   | 10  |

## EXPERIMENTAL SECTION

**Instruments.** Transmission electron microscopy images obtained on JEM-100CXII microscope (JEOL, Ltd., Japan). UV-Vis absorption spectra were recorded on a Hitachi U-4100 UV/Vis spectrophotometer (Kyoto, Japan). Fluorescence images of cells were obtained using an Olympus FV1000-MPE multiphoton laser scanning confocal microscope (Japan). The pH was measured with a model 868 pH meter (Orion).

**Table S1.** Oligonucleotides Used in This Work\*

| Entry            | Sequence (5'-3')                                                    |
|------------------|---------------------------------------------------------------------|
| Capture sequence | TGT CGT CCC GAG AGT TTT TTT-SH                                      |
| Aptamer sequence | TAMRA-CTC TCG GGA CGA CAG CCG AGT TGA TTC AAC<br>AGC CGA GTC GTC CC |

**Table S2.** Determination of Glucose in Cell Lysate

| Sample | Added ( $\mu$ M) | Measured ( $\mu$ M) | Recovery (%) |
|--------|------------------|---------------------|--------------|
| 1      | 0                | 0.27 $\pm$ 0.3      | ---          |
| 2      | 50               | 51 $\pm$ 1.4        | 101          |
| 3      | 100              | 98 $\pm$ 2.6        | 98           |

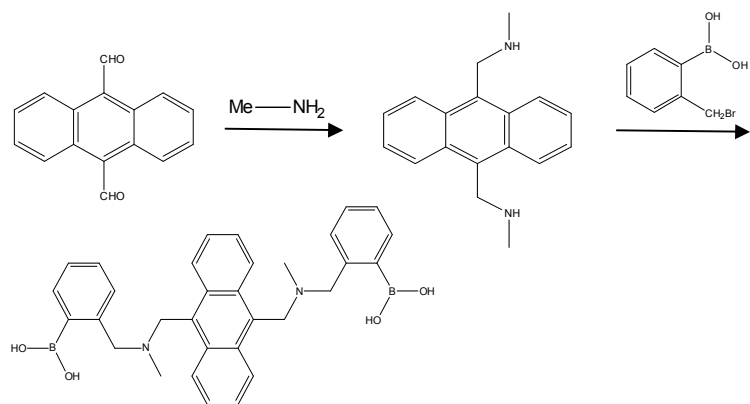

**Figure S1.** The synthetic route of the Shinkai's receptor.

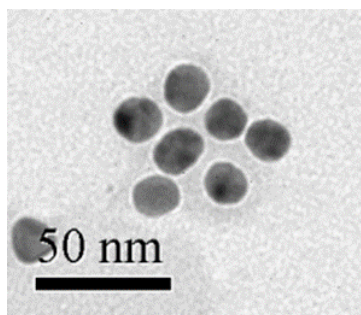

**Figure S2.** Representative TEM image of AuNPs.

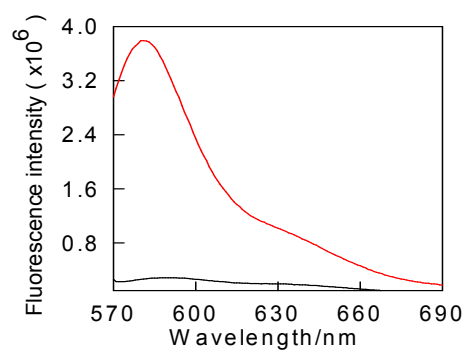

**Figure S3.** Fluorescence spectrum of TAMRA-labeled aptamer before (red curve) and after (black curve) conjugation to the surface of AuNPs.

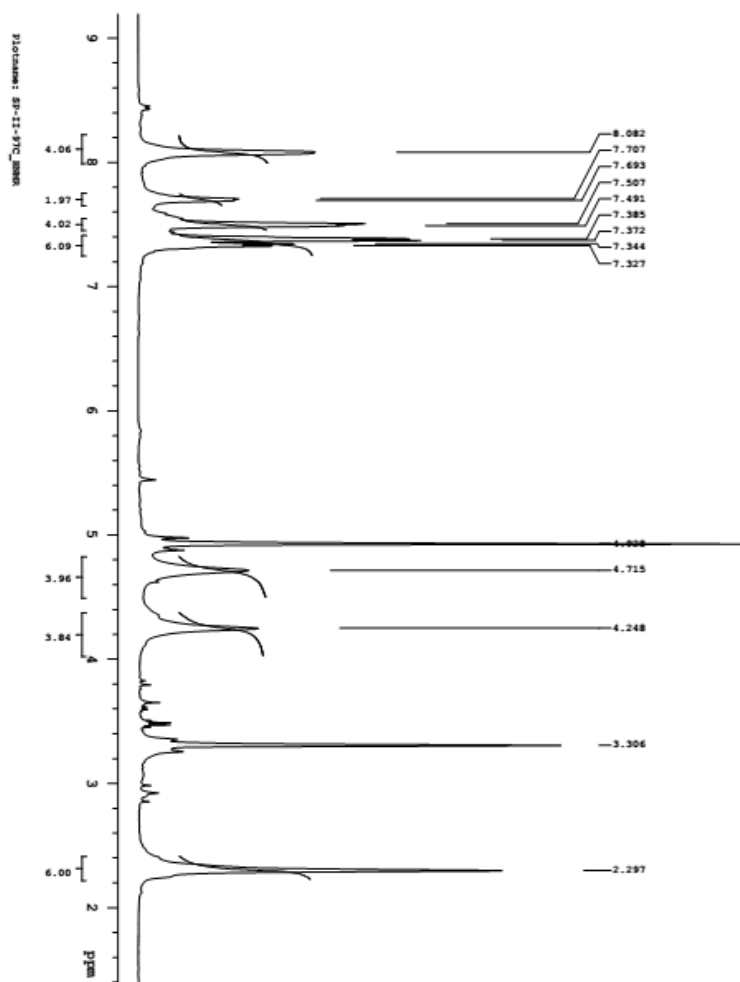

**Figure S4.** <sup>1</sup>H NMR of the Shinkai's receptor.

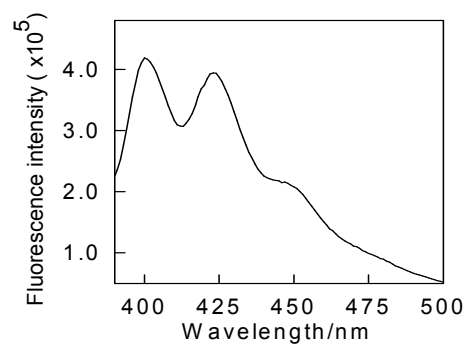

**Figure S5.** Fluorescence spectrum of the Shinkai's receptor. The excitation wavelength was 370 nm.

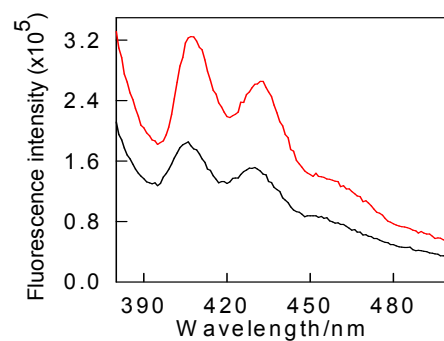

**Figure S6.** Fluorescence spectrum of the Shinkai's receptor-encapsulated liposomes before (black curve) and after (red curve) Triton X-100 treated. The excitation wavelength was 370 nm.

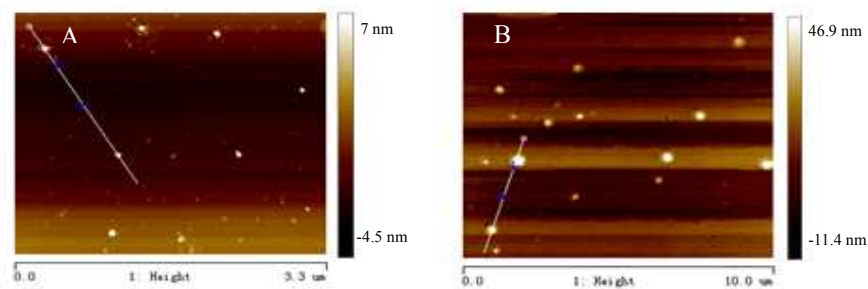

**Figure S7.** Representative AFM images of AuNPs (A) the synthetic Shinkai's receptor-encapsulated liposome (B).

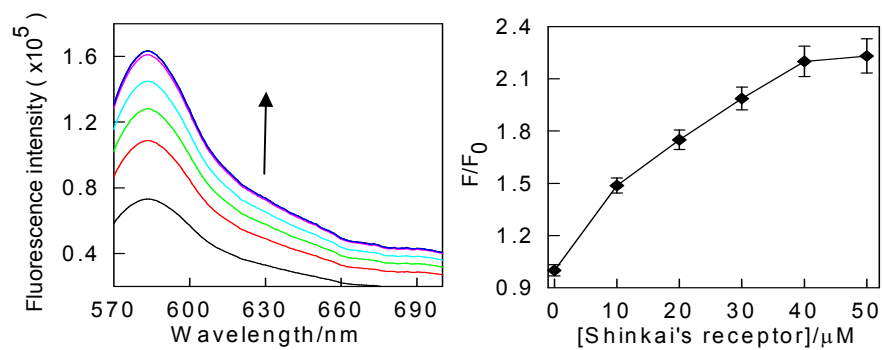

**Figure S8.** The fluorescence recovery of AuNP@ODs upon 10 mM glucose addition with aid of different concentrations of the Shinkai's receptor.

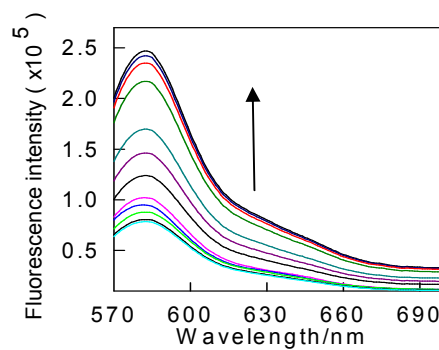

**Figure S9.** Representative fluorescence spectrum of AuNP@ODs (10 nM) as functions of different concentrations of glucose with aid of the Shinkai's receptor (50  $\mu\text{M}$ ). The arrows indicate the concentration from 0 to 2 mM (0, 0.1, 0.5, 1, 10, 100, 250, 500, 1000, 1500, 1750, 2000  $\mu\text{M}$ ).

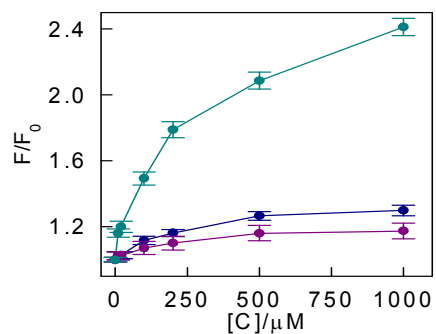

**Figure S10.** The fluorescence recovery of AuNP@ODs (10 nM) upon different concentration of glucose, galactose and fructose addition with aid of Shinkai's receptor (50  $\mu\text{M}$ ).



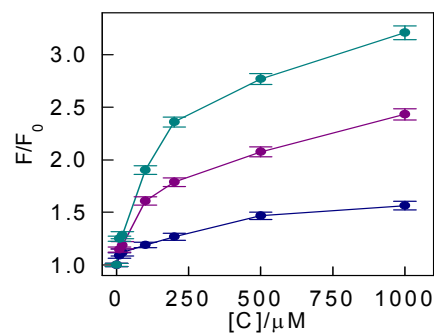

**Figure S11.** The fluorescence recovery of the Shinkai's receptor (50  $\mu\text{M}$ ) upon different concentration of glucose, fructose and galactose.

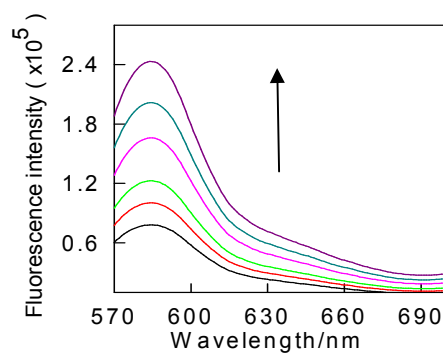

**Figure S12.** Fluorescence spectra of nanokit upon addition of different concentrations of glucose after treated by Triton-100. The arrows indicated the concentration of glucose: 0, 10, 100, 500, 1000, 2000  $\mu\text{M}$ .

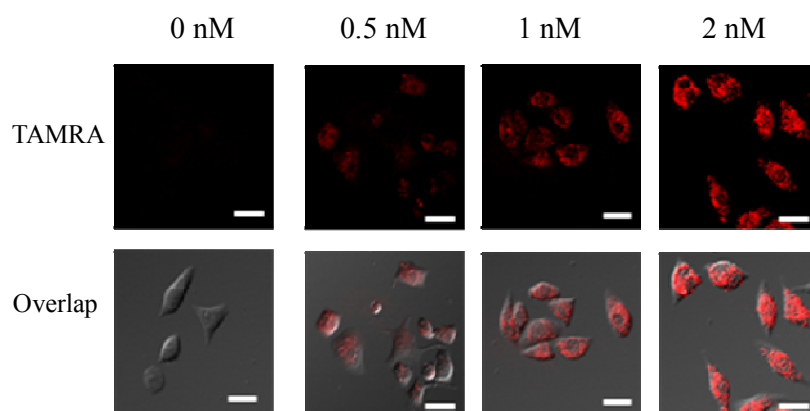

**Figure S13.** Confocal microscopy images recorded at TAMRA channel of the nanokit-treated HeLa cells as a function of different concentrations of nanokit.

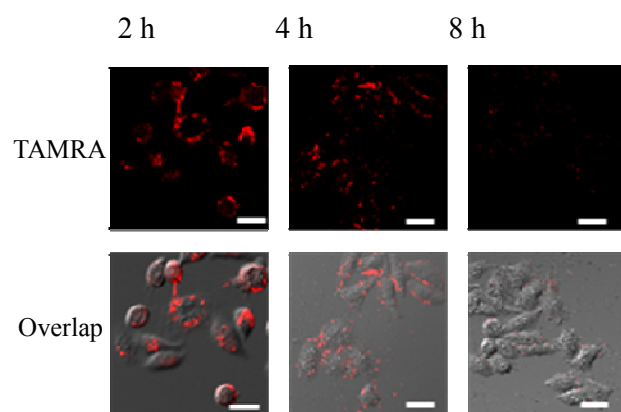

**Figure S14.** Intracellular glucose imaging of HeLa cells under 10% O<sub>2</sub> as functions of time. The concentration of the nanokit was 2 nM.
